# Supplementary material for: Protein interactions with piALU RNA indicates putative participation of retroRNA in the cell cycle, DNA repair and chromatin assembly
Source: PubMed Central journal article supplement — Mob Genet Elements. 2012 Jan 1;2(1):26–35. doi: 10.4161/mge.19032 (PMC3383447; doi:10.4161/mge.19032), 2012-01-01
Supplement: mge-2-26-s01.pdf [file mge-2-26-s01.pdf]

# Supplementary Figure 1

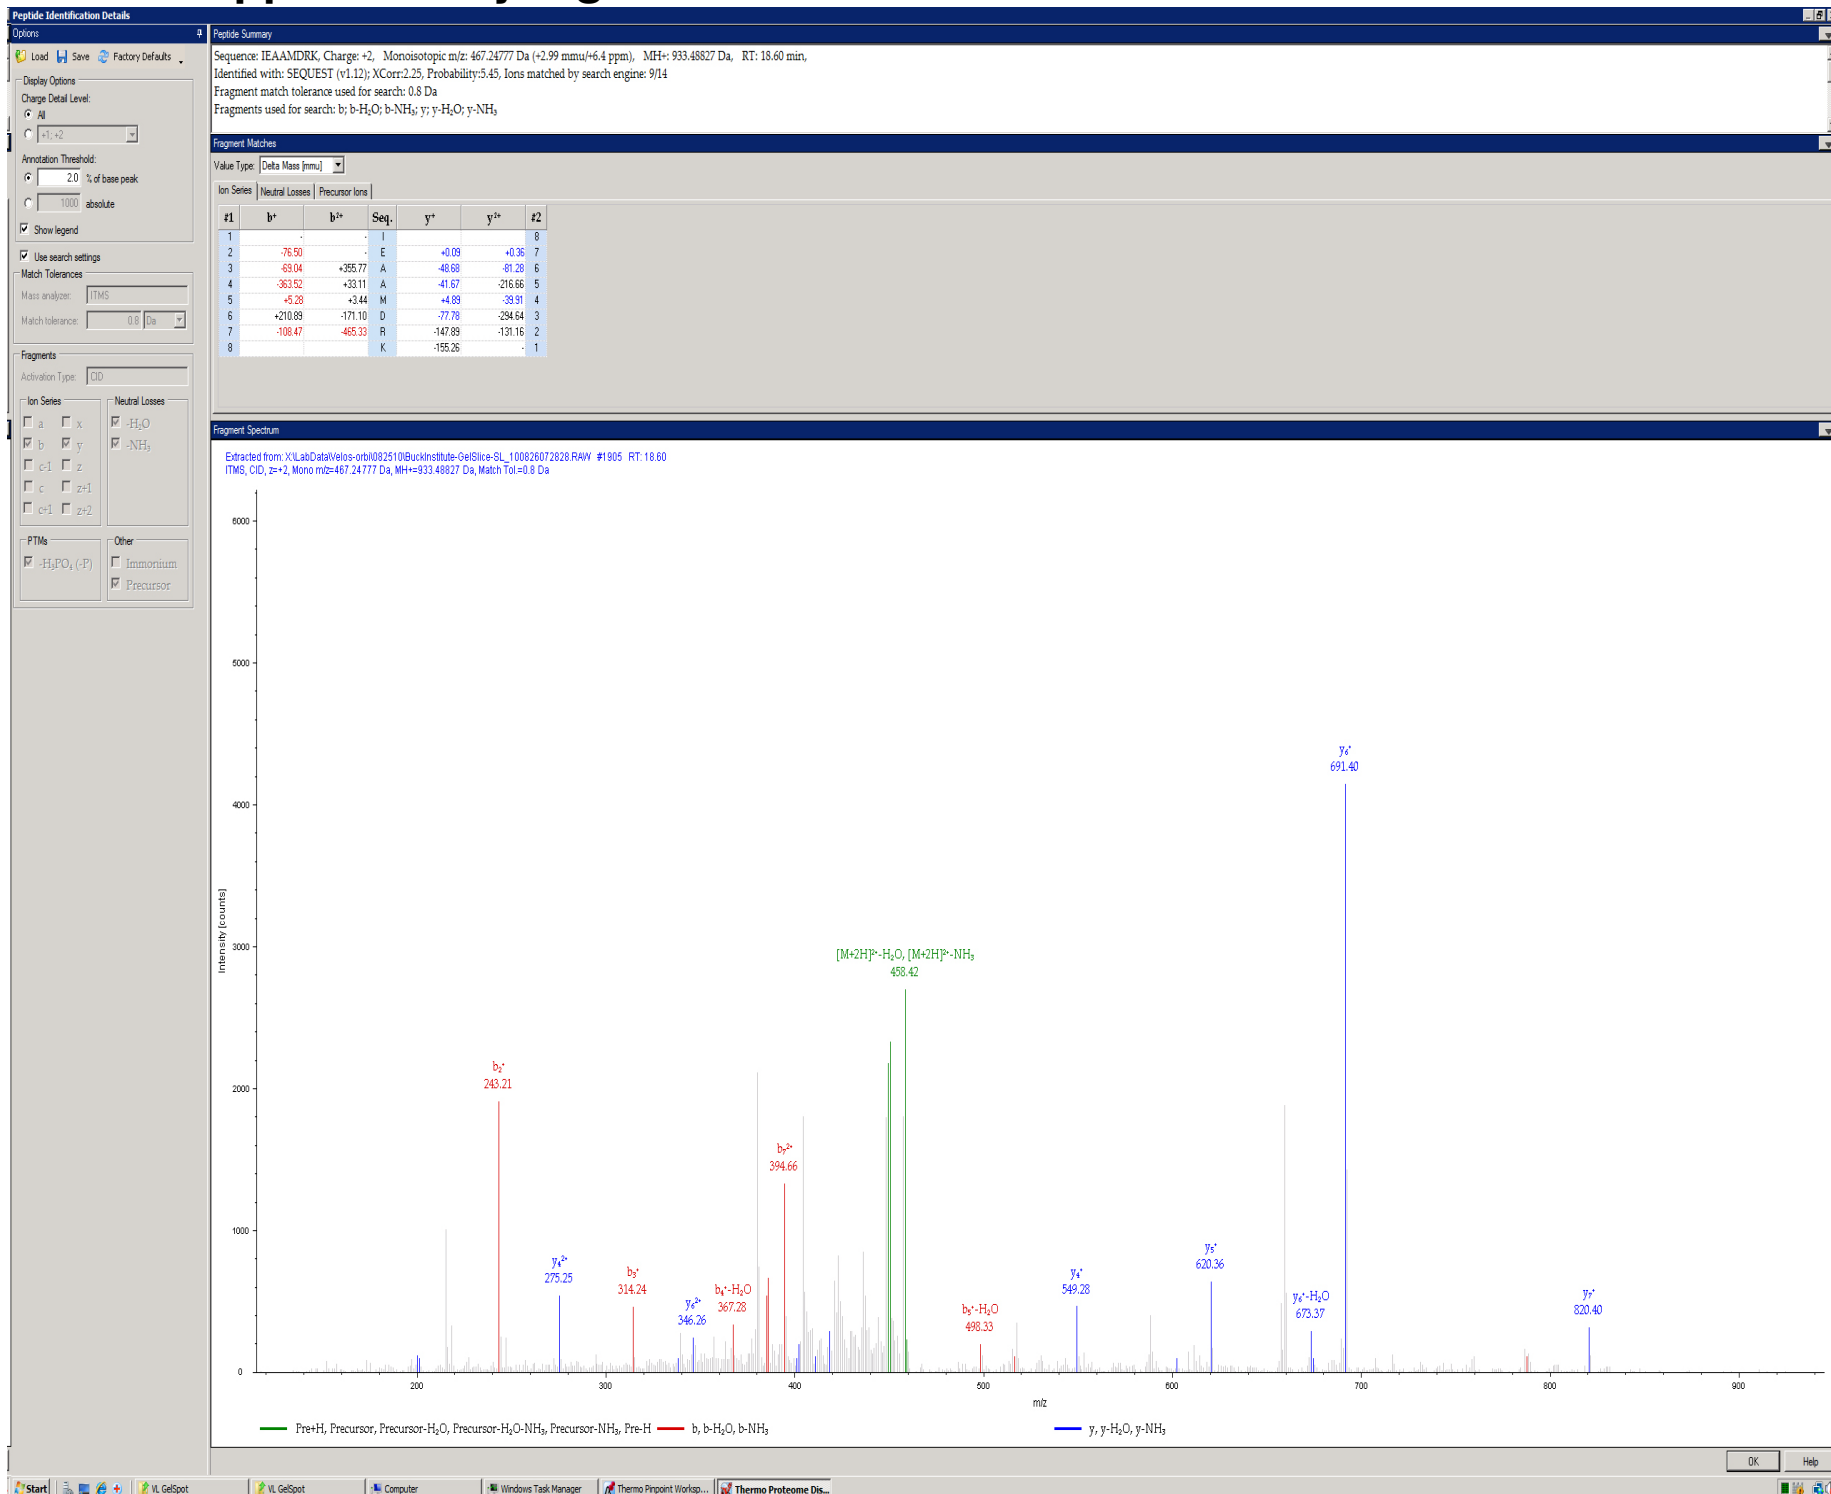

Supplementary Figure 1: Fragmentation spectrum of MLL protein. Eight of fourteen possible fragment ions match under 100 mmu (milli mass units) mass error.
